# Supplementary material
Source: HighWire-hosted journal article supplement (https://diabetes.diabetesjournals.org/content/suppl/2006/06/29/55.7.2098)

## **Appendix**

### **Figure Legends Appendix**

Figure 1. Expression of surface markers GITR, CTLA-4, and CD62L by NOD CD4<sup>+</sup>CD25<sup>+</sup> cells. Spleen cells from pre-diabetic (A) or Sick (B) NOD mice were collected and labeled for CD4, CD25 and either GITR, CTLA-4, or CD62L. CD4<sup>+</sup>CD25<sup>+</sup> cells were gated and analyzed for expression of surface markers by FACS<sup>®</sup>.

Figure 2. Pre and post purification histograms for CD90<sup>+</sup> and CD4<sup>+</sup>CD25<sup>-</sup> cells. Spleen cells were separated into the CD90<sup>-</sup> and CD90<sup>+</sup> fractions, and labeled for CD3. Most purified CD90<sup>+</sup> cells are CD3<sup>+</sup> (A). In some cases, CD90<sup>+</sup> cells were also depleted of CD25<sup>+</sup> cells and pre and post depletion histograms are shown (B).

Figure 1 Appendix

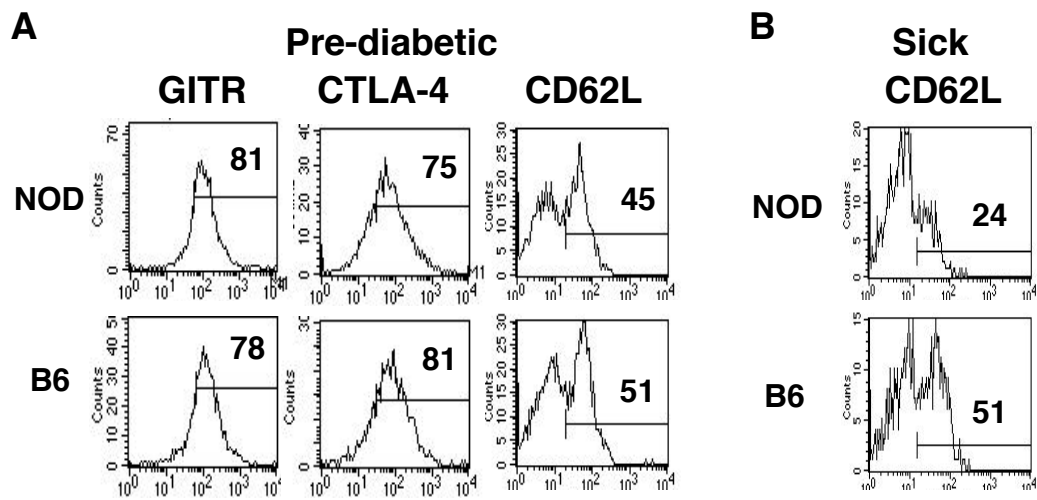

Figure 2 Appendix

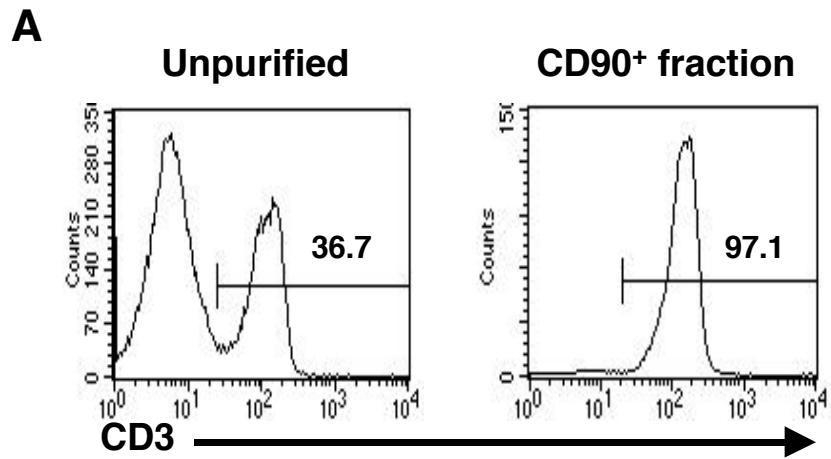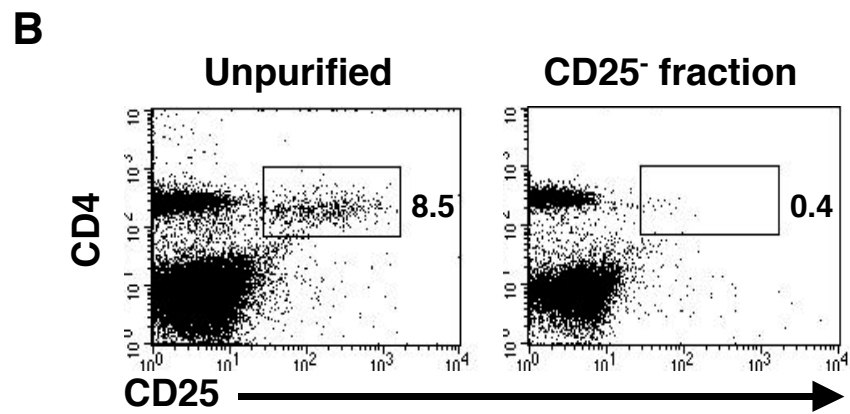

Supplement: Pg2098OnlineAppendix.pdf [file Pg2098OnlineAppendix.pdf]
